# Supplementary material for: Discovery of a fluorene class of compounds as inhibitors of botulinum neurotoxin serotype E by virtual screening
Source: Royal Society of Chemistry journal article supplement (doi:10.1039/c2cc17158a), 2012-01-01
Supplement: c2cc17158a.pdf [file c2cc17158a.pdf]

**Table S1. Chemical structures of NCI Compounds tested and their inhibitory activity against BoNT/E.**

| S. No. | Div. No. | NSC No. | Structure                                                                            | Inhibition of BoNT/E at 250 $\mu$ M |
|--------|----------|---------|--------------------------------------------------------------------------------------|-------------------------------------|
| 1      | 4        | 1012    | 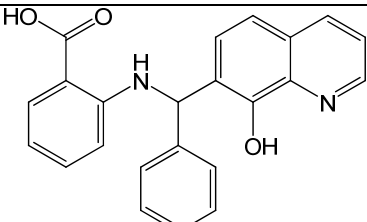   | 63.1                                |
| 2      | 98       | 9600    |    | 49.7                                |
| 3      | 100      | 9746    |   | 25.1                                |
| 4      | 133      | 12181   |  | 6.8                                 |
| 5      | 355      | 28620   |  | 71.1                                |

|    |      |        |                                                                                      |      |
|----|------|--------|--------------------------------------------------------------------------------------|------|
| 6  | 628  | 50155  | 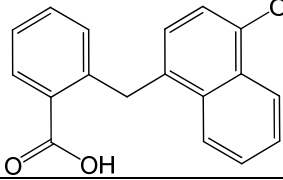   | 21.3 |
| 7  | 775  | 67690  |    | 37.2 |
| 8  | 834  | 77053  |    | 83.4 |
| 9  | 969  | 92828  |    | 28.3 |
| 10 | 991  | 95090  |   | 3.9  |
| 11 | 1279 | 125908 |  | 51.4 |
| 12 | 1292 | 128598 |  | 69.1 |

|    |      |        |                                                                                      |      |
|----|------|--------|--------------------------------------------------------------------------------------|------|
| 13 | 1618 | 259969 | 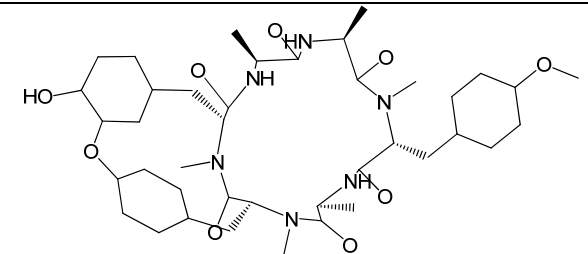   | 0.0  |
| 14 | 1633 | 274547 |    | 91.6 |
| 15 | 1792 | 343227 |    | 31.5 |
| 16 | 1853 | 371876 |   | 0.0  |
| 17 | 1854 | 371878 |  | 33.6 |
| 18 | 1896 | 402959 |  | 0.0  |
